# Supplementary material for: Supramolecular assemblies controlled by cucurbit[n]uril size (n = 6, 7, 8 and 10)
Source: Royal Society of Chemistry journal article supplement (doi:10.1039/d0nj00087f), 2020-01-01
Supplement: d0nj00087f1.pdf [file d0nj00087f1.pdf]

## Electronic Supplementary Information

### **Supramolecular Assemblies Controlled by Cucurbit[*n*]uril Size (*n* = 6, 7, 8 and 10)**

Weitao Xu,<sup>a</sup> Xinyu Deng,<sup>a</sup> Xin Xiao,<sup>a\*</sup> Bing Bian,<sup>c</sup> Qing Chen,<sup>a\*</sup> Scott J. Dalgarno,<sup>d</sup>

Zhu Tao,<sup>a</sup> and Carl Redshaw,<sup>b\*</sup>

<sup>a</sup> *Key Laboratory of Macrocyclic and Supramolecular Chemistry of Guizhou Province, Guizhou University, Guiyang 550025, China*

<sup>b</sup> *Department of Chemistry and Biochemistry, University of Hull, Hull HU6 7RX, U.K.*

<sup>c</sup> *College of Chemical and Environmental Engineering, Shandong University of Science and Technology, Qingdao 266590, P. R. China.*

<sup>d</sup> *Institute of Chemical Sciences, School of Engineering and Physical Sciences, Heriot-Watt University, Edinburgh EH14 4AS, U.K.*

\*Corresponding author. Tel./fax: +86 15519089928

E-mail address: gyhxxiaoxin@163.com (X. Xiao);

c.redshaw@hull.ac.uk (C. Redshaw)

## Contents

**Figure S1.** The COSY spectrums of **G** with 2.221 equivalents of TMeQ[6] in D<sub>2</sub>O (400 MHz).

**Table S1.** <sup>1</sup>H NMR spectral changes observed for the **G**@TMeQ[6] system on addition of one equivalent of TMeQ[6] and the **G**@Q[7] system on addition of one equivalent of Q[7].

**Figure S2.** The COSY spectrum of **G** with 1.706 equivalent of Q[7] in D<sub>2</sub>O (400 MHz).

**Figure S3.** (Colour online) (A) Electronic absorption of **G** ( $2 \times 10^{-5}$  mol L<sup>-1</sup>) upon addition of increasing amounts (0, 0.2, 0.4, ..., 2.6, 2.8, 3.0 equivalents) of TMeQ[6]; (B) concentration and absorbance vs.  $N_{\text{TMeQ[6]}}/N_{\text{G}}$  plots.

**Figure S4.** (Colour online) (A) Electronic absorption of **G** ( $2 \times 10^{-5}$  mol L<sup>-1</sup>) upon addition of increasing amounts (0, 0.2, 0.4, ..., 2.6, 2.8, 3.0 equivalents) of Q[8]; (B) concentration and absorbance vs.  $N_{\text{Q[8]}}/N_{\text{G}}$  plots; (C) the corresponding  $\Delta A - N_{\text{Q[8]}}/(N_{\text{Q[8]}} + N_{\text{G}})$  curves.

**Figure S5.** (Colour online) (A) Electronic absorption of **G** ( $2 \times 10^{-5}$  mol L<sup>-1</sup>) upon addition of increasing amounts (0, 0.2, 0.4, ..., 2.6, 2.8, 3.0 equiv.) of Q[10]; (B) concentration and absorbance vs.  $N_{\text{Q[10]}}/N_{\text{G}}$  plots.

**Figure S6.** MALDI-TOF mass spectrometry of TMeQ[6]@**G** (A), Q[7]@**G** (B), Q[8]@**G** (C) and Q[10]@**G** (D).

**Figure S7.** ITC data for the binding of **G** with Q[*n*] (TMeQ[6], Q[7], Q[8], Q[10]) in aqueous solution.

**Table S2.** Binding constant values of cucurbit[*n*]urils with some alkyl-substituted 4-pyrrolidinopyridinium salts by ITC.

**Figure S8.** Single crystal X-ray structure of [**G**<sub>2</sub>][CdCl<sub>4</sub>] with  $\pi \dots \pi$  interaction.

**Figure S9.** <sup>1</sup>H NMR spectrum of **G** in D<sub>2</sub>O (400 MHz).

**Figure S10.** <sup>13</sup>C NMR spectrum of **G** in D<sub>2</sub>O (400 MHz).

**Figure S11.** COSY spectrum of **G** in D<sub>2</sub>O (400 MHz).

**Figure S12.** Mass spectrum of **G** in H<sub>2</sub>O.

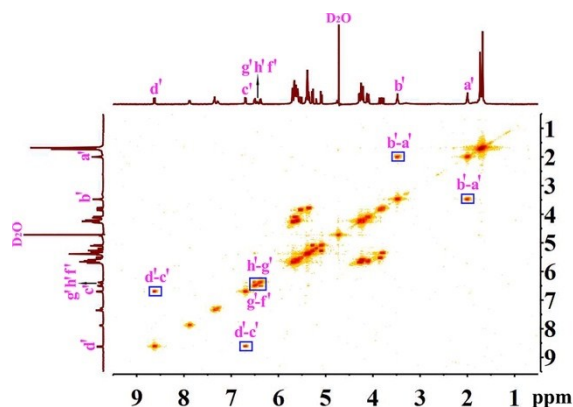

**Figure S1.** The COSY spectrum of **G** with 2.22 equivalents of TMeQ[6] in D<sub>2</sub>O (400 MHz).

|                                   | H <sub>a</sub> | H <sub>b</sub> | H <sub>c</sub> | H <sub>d</sub> | H <sub>e</sub> | H <sub>f</sub> | H <sub>gh</sub> |
|-----------------------------------|----------------|----------------|----------------|----------------|----------------|----------------|-----------------|
| free <b>G</b>                     | 1.97           | 3.40           | 6.64           | 7.92           | 5.21           | 7.27           | 7.37            |
| <b>G</b> with 1.00 equiv. TMeQ[6] | 2.01           | 3.49           | 6.71           | 8.65           | 4.74           | 6.39           | 6.52, 6.46      |
| field shift                       | -0.04          | -0.09          | -0.07          | -0.73          | 0.47           | 0.88           | 0.85, 0.91      |
| <b>G</b> with 1.00 equiv. Q[7]    | 1.85           | 3.02           | 6.16           | 7.68           | 4.88           | 6.80           | 7.06            |
| field shift                       | 0.12           | 0.38           | 0.48           | 0.24           | 0.33           | 0.47           | 0.31            |

**Table S1.** <sup>1</sup>H NMR spectral changes observed for the **G**@TMeQ[6] system on addition of one equivalent of TMeQ[6] and the **G**@Q[7] system on addition of one equivalent of Q[7].

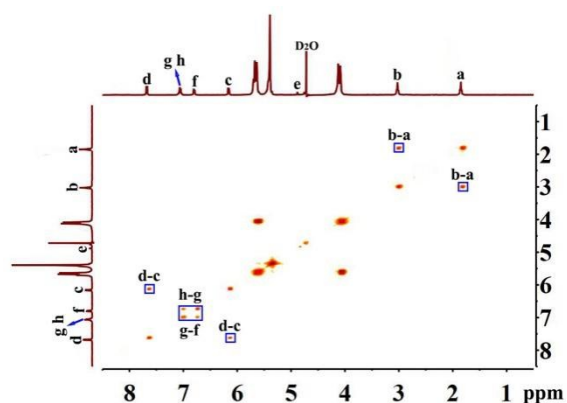

**Figure S2.** The COSY spectra of **G** with 1.706 equivalent of Q[7] in D<sub>2</sub>O (400 MHz).

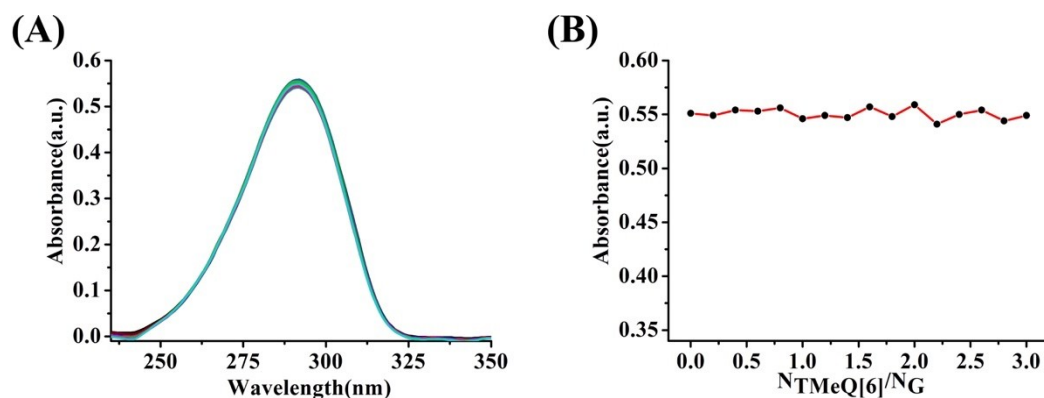

**Figure S3.** (Colour online) (A) Electronic absorption of **G** ( $2 \times 10^{-5}$  mol L $^{-1}$ ) upon addition of increasing amounts (0, 0.2, 0.4, ..., 2.6, 2.8, 3.0 equivalents) of TMeQ[6]; (B) concentration and absorbance vs.  $N_{\text{TMeQ[6]}}/N_{\text{G}}$  plots.

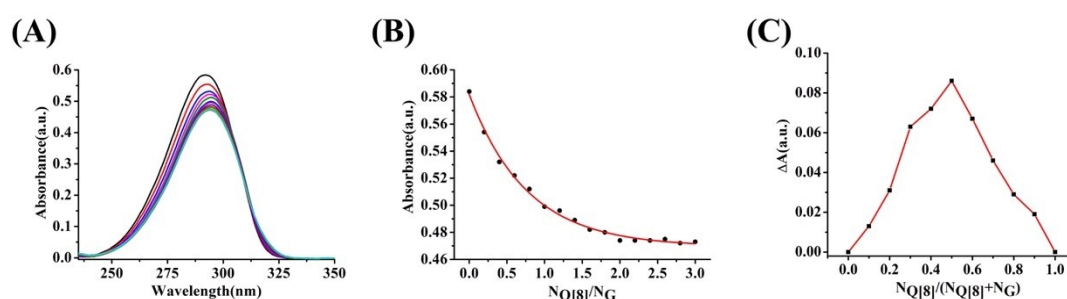

**Figure S4.** (Colour online) (A) Electronic absorption of **G** ( $2 \times 10^{-5}$  mol L $^{-1}$ ) upon addition of increasing amounts (0, 0.2, 0.4, ..., 2.6, 2.8, 3.0 equivalents) of Q[8]; (B) concentration and absorbance vs.  $N_{\text{Q[8]}}/N_{\text{G}}$  plots; (C) the corresponding  $\Delta A - N_{\text{Q[8]}}/(N_{\text{Q[8]}} + N_{\text{G}})$  curves.

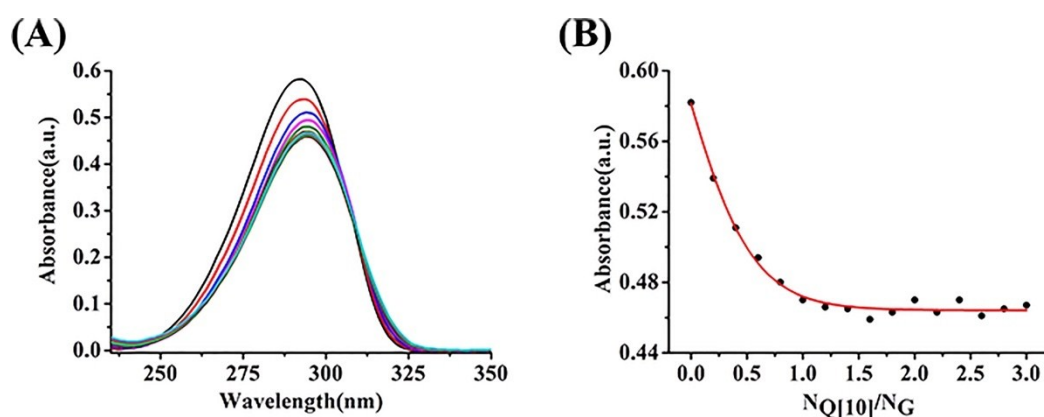

**Figure S5.** (Colour online) (A) Electronic absorption of **G** ( $2 \times 10^{-5}$  mol L $^{-1}$ ) upon addition of increasing amounts (0, 0.2, 0.4, ..., 2.6, 2.8, 3.0 equivalents) of Q[10]; (B) concentration and absorbance vs.  $N_{\text{Q[10]}}/N_{\text{G}}$  plots.

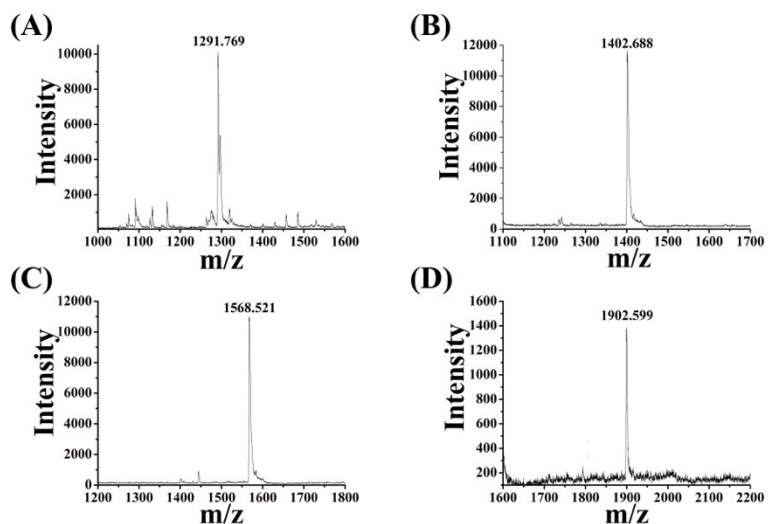

**Figure S6.** MALDI-TOF mass spectra of TMeQ[6]@G (A), Q[7]@G (B), Q[8]@G (C) and Q[10]@G (D).

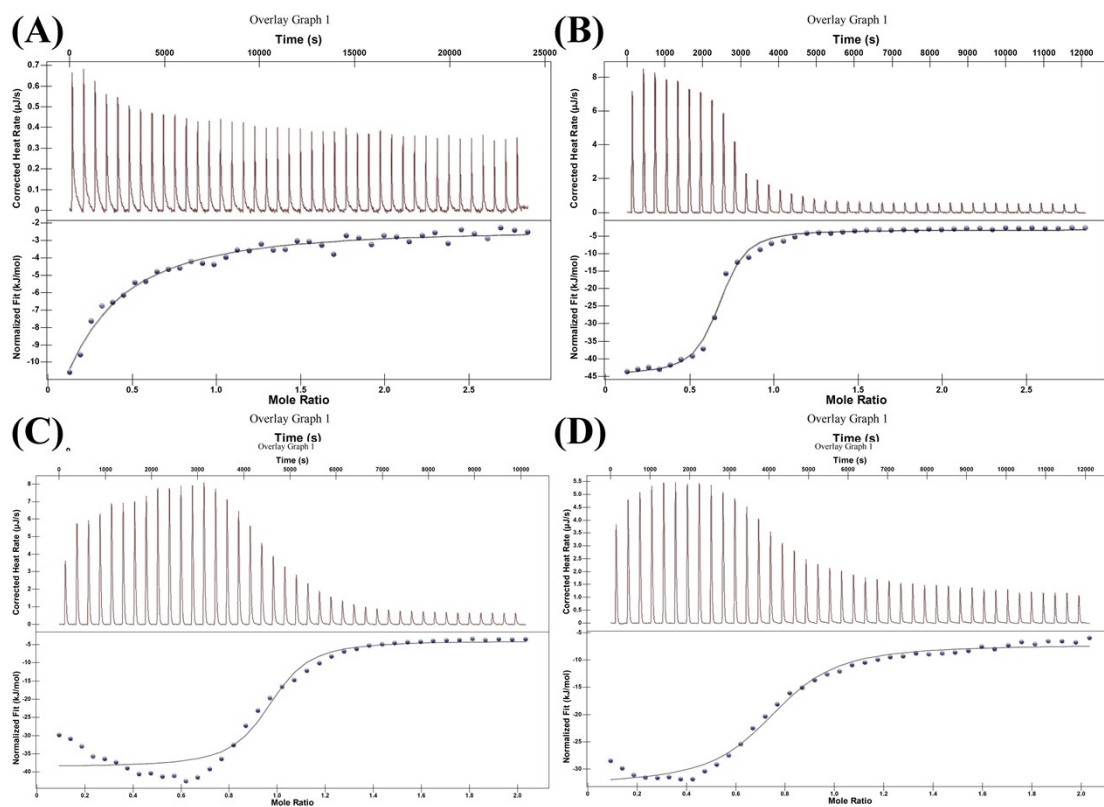

**Figure S7.** ITC data for the binding of G with Q[n] (TMeQ[6], Q[7], Q[8], Q[10]) in aqueous solution.

| Host    | guest | $K_a$ ( $M^{-1}$ )            | Ref          |
|---------|-------|-------------------------------|--------------|
| Q[8]    | g1    | $1.541 \times 10^4$           | 1            |
|         | g2    | $4.714 \times 10^5$           |              |
|         | g3    | $8.477 \times 10^5$           |              |
|         | g4    | $5.541 \times 10^6$           |              |
|         | g5    | $5.597 \times 10^6$           |              |
|         | g6    | $3.333 \times 10^6$           |              |
| TMeQ[6] | g2    | $(4.23 \pm 0.6) \times 10^5$  | 2            |
|         | g3    | $(1.08 \pm 0.32) \times 10^6$ |              |
| TMeQ[6] | G     | $(1.98 \pm 0.5) \times 10^4$  | In this work |
| Q[7]    |       | $(1.07 \pm 0.4) \times 10^6$  |              |
| Q[8]    |       | $(1.39 \pm 0.8) \times 10^6$  |              |
| Q[10]   |       | $(3.03 \pm 0.6) \times 10^5$  |              |

**Table S2.** Binding constant values of cucurbit[*n*]urils with some alkyl-substituted 4-pyrrolidinopyridinium salts by ITC. 4-( $C_4H_8N$ ) $C_5H_5NRBr$ , R=Et (g1), *n*-butyl (g2), *n*-pentyl (g3), *n*-hexyl (g4), *n*-octyl (g5), *n*-dodecyl (g6).

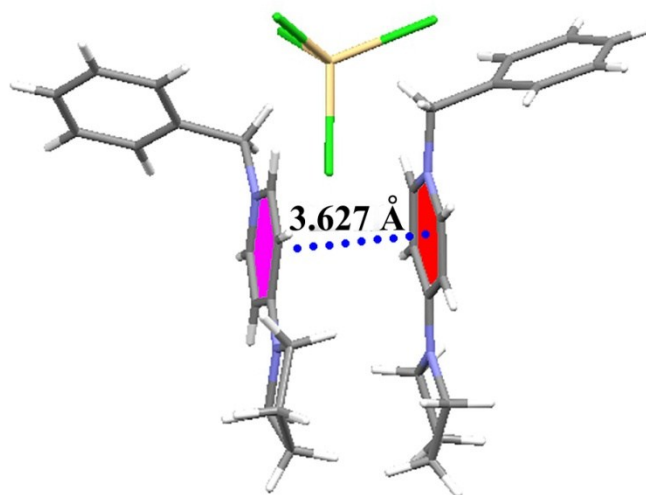

**Figure S8.** Single crystal X-ray structure of  $[G_2][CdCl_4]$  showing a  $\pi \dots \pi$  interaction.

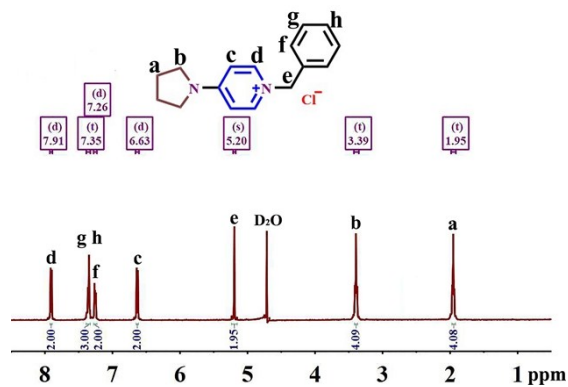

**Figure S9.** <sup>1</sup>H NMR spectrum of **G** in D<sub>2</sub>O (400 MHz).

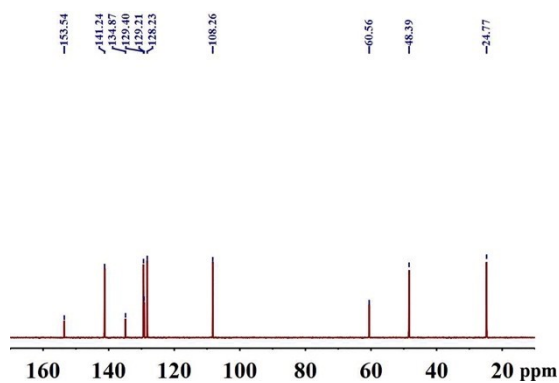

**Figure S10.** <sup>13</sup>C NMR spectrum of **G** in D<sub>2</sub>O (400 MHz).

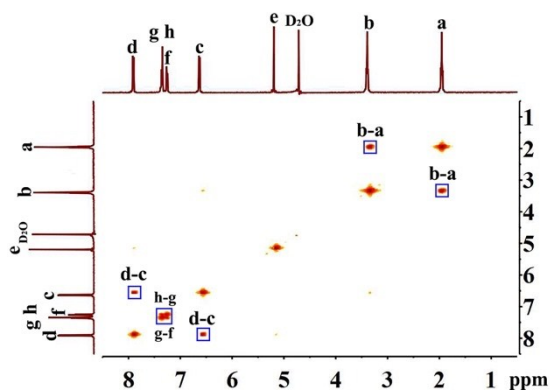

**Figure S11.** COSY spectrum of **G** in D<sub>2</sub>O (400 MHz).

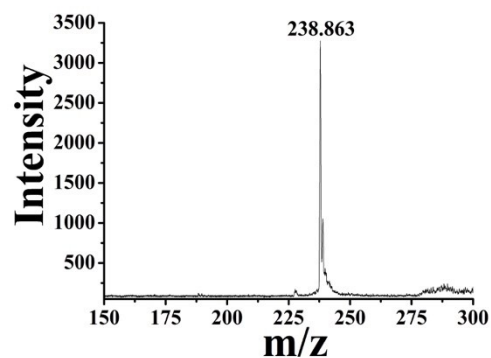

**Figure S12.** Mass spectrometry of **G** in H<sub>2</sub>O.

### References

- [1] W. Xu, J. Kan, B. Yang, T. J. Prior, B. Bian, X. Xiao, Z. Tao and C. Redshaw, *Chem. Asian J.* **2019**, *14*, 235–242.
- [2] B. Yang, X. Xiao, Y.-Q. Zhang, Q.-J. Zhu, S.-F. Xue, Z. Tao and G. Wei, *RSC Adv.*, **2014**, *4*, 44359-44366.
